# Supplementary material for: Human neonatal rotavirus vaccine (RV3-BB) targets rotavirus from birth
Source: PubMed Central journal article supplement (PMC5774175; doi:10.1056/nejmoa1706804), 2018-02-22
Supplement: NEJMoa1706804Bines_SuppApp.pdf [file NEJMoa1706804Bines_SuppApp.pdf]

## SUPPLEMENTARY APPENDIX

### Human neonatal rotavirus vaccine (RV3-BB) targets rotavirus from birth

Julie E. Bines, M.D. <sup>1,2,3</sup>  
Jarir At Thobari, Ph.D. <sup>4</sup>  
Cahya Dewi Satria, M.D. <sup>4</sup>  
\*Amanda Handley, M.P.H. <sup>1,5</sup>  
\*Emma Watts, B. Sci. (Hons) <sup>1</sup>  
Daniel Cowley, Ph.D. <sup>1,2</sup>  
Hera Nirwati, M.D., Ph. D. <sup>4</sup>  
James Ackland, B.Sci. <sup>6</sup>  
Jane Standish, M.B.B.S. <sup>1,3</sup>  
Frances Justice, B.Sci. <sup>1</sup>  
Gabrielle Byars, MBioMedSci <sup>1</sup>  
Katherine J. Lee, Ph.D. <sup>1,2</sup>  
Graeme L. Barnes, M.D. <sup>1,2</sup>  
Novilia S. Bachtiar, dr M.Kes. <sup>7</sup>  
Ajeng Viska Icanervilia M.D. <sup>4</sup>  
Karen Boniface, B.Sci (Hons) <sup>1</sup>  
Nada Bogdanovic-Sakran, B.Sci <sup>1</sup>  
Daniel Pavlic, B.Sci (Hons) <sup>1</sup>  
Ruth F. Bishop, A.O., D. Sc. <sup>1,2</sup>  
Carl D. Kirkwood, Ph.D. <sup>1,2,8</sup>  
Jim P. Buttery, M.D. <sup>1,2,9</sup>  
Yati Soenarto, M.D., D.Sc <sup>4</sup>

*\*Joint authors*

**From the:**

<sup>1</sup>RV3 Rotavirus Vaccine Program, Murdoch Childrens Research Institute, Parkville, Victoria, Australia (J.E.B., A.H., D.C., E.W., C.D.K., J.S., K.J.L, F.J., G.B., K.B., N.B., D.P., G.L.B., R.F.B., J.P.B.)

<sup>2</sup>Department of Paediatrics, The University of Melbourne (J.E.B., D.C., C.D.K., K.J.L., G.L.B., R.F.B., J.P.B.)

<sup>3</sup>Department of Gastroenterology and Clinical Nutrition, Royal Children's Hospital (J.E.B., J.S.)

<sup>4</sup>Pediatric Research Office, Department of Paediatrics (C.D.S, A.V.I., Y.S.), Department of Pharmacology and Therapy (J.A.T.) and Department of Microbiology (H.N.W.); Faculty of Medicine, Universitas Gadjah Mada, Yogyakarta

<sup>5</sup>Medicines Development for Global Health, Melbourne, Australia (A.H)

<sup>6</sup>Global BioSolutions, Melbourne, Australia (J.A.)

<sup>7</sup>PT Bio Farma, Bandung, Indonesia (N.S.B.)

<sup>8</sup>Bill and Melinda Gates Foundation, Seattle, U.S.A. (C.D.K.)

<sup>9</sup>Departments of Paediatrics and Epidemiology & Preventive Medicine, Monash University; Department of Infection & Immunity, Monash Children's Hospital, Clayton, Victoria, Australia (J.P.B.)

**Corresponding author:**

Professor Julie Bines

The University of Melbourne

Level 2, Royal Children's Hospital, 50 Flemington Rd,

Parkville, 3052 Victoria, Australia

Email: [jebines@unimelb.edu.au](mailto:jebines@unimelb.edu.au)

**Table of Contents:**

|                                                                           |         |
|---------------------------------------------------------------------------|---------|
| <b>Table S1:</b> Demographic characteristics of the Study Population      | Page 4  |
| Table S1A: PP population                                                  |         |
| Table S1B: ITT population                                                 |         |
| Table S1C: Safety population                                              |         |
| <b>Table S2:</b> Additional secondary analyses of RV3-BB Vaccine Efficacy | Page 7  |
| <b>Table S3:</b> Vaccine take and Components of Vaccine Take              | Page 9  |
| Table S4A Neonatal Schedule                                               |         |
| Table S4B Infant Schedule                                                 |         |
| <b>Table S4:</b> Adverse Events in the Safety Population                  | Page 11 |
| <b>Table S5:</b> Fatal Events                                             | Page 13 |

**TABLE S1A: DEMOGRAPHIC CHARACTERISTICS OF STUDY POPULATION (PP POPULATION)**

|                             | Neonatal Vaccine Schedule<br>(N=498) | Infant Vaccine Schedule<br>(N=511) | Placebo<br>(N=504) |
|-----------------------------|--------------------------------------|------------------------------------|--------------------|
| Age at randomization (days) |                                      |                                    |                    |
| Mean (SD)                   | 3.4 (1.3)                            | 3.5 (1.3)                          | 3.5 (1.3)          |
| Sex                         |                                      |                                    |                    |
| Male                        | 270 (54.2%)                          | 265 (51.9%)                        | 256 (50.8%)        |
| Ethnicity                   |                                      |                                    |                    |
| Javanese                    | 497 (99.8%)                          | 509 (99.6%)                        | 502 (99.6%)        |
| Sundanese                   | 0 (0.0%)                             | 0 (0.0%)                           | 1 (0.2%)           |
| Chinese                     | 0 (0.0%)                             | 1 (0.2%)                           | 0 (0.0%)           |
| Malaya                      | 0 (0.0%)                             | 0 (0.0%)                           | 0 (0.0%)           |
| Other                       | 1 (0.2%)                             | 1 (0.2%)                           | 1 (0.2%)           |
| Gestational Age (weeks)     |                                      |                                    |                    |
| Mean (SD)                   | 39.55 (1.10)                         | 39.53 (1.08)                       | 39.54 (1.12)       |
| Birth Weight (g)            |                                      |                                    |                    |
| Mean (SD)                   | 3117.57 (347.65)                     | 3136.01 (333.55)                   | 3106.25 (338.35)   |
| Height/Length (cm)          |                                      |                                    |                    |
| Mean (SD)                   | 48.70 (1.65)                         | 48.65 (1.67)                       | 48.62 (1.68)       |

**Table S1B: DEMOGRAPHIC CHARACTERISTICS OF STUDY POPULATION (ITT POPULATION)**

|                             | Neonatal Vaccine Schedule<br>(N=549) | Infant Vaccine Schedule<br>(N=550) | Placebo<br>(N=550) |
|-----------------------------|--------------------------------------|------------------------------------|--------------------|
| Age at randomization (days) |                                      |                                    |                    |
| Mean (SD)                   | 3.4 (1.3)                            | 3.5 (1.3)                          | 3.5 (1.3)          |
| Sex                         |                                      |                                    |                    |
| Male                        | 297 (54.1%)                          | 288 (52.4%)                        | 279 (50.7%)        |
| Ethnicity                   |                                      |                                    |                    |
| Javanese                    | 548 (99.8%)                          | 548 (99.6%)                        | 548 (99.6%)        |
| Sundanese                   | 0 (0.0%)                             | 0 (0.0%)                           | 1 (0.2%)           |
| Chinese                     | 0 (0.0%)                             | 1 (0.2%)                           | 0 (0.0%)           |
| Malaya                      | 0 (0.0%)                             | 0 (0.0%)                           | 0 (0.0%)           |
| Gestational Age (weeks)     |                                      |                                    |                    |
| Mean (SD)                   | 39.55 (1.11)                         | 39.51 (1.10)                       | 39.52 (1.12)       |
| Weight (g)                  |                                      |                                    |                    |
| Mean (SD)                   | 3118.16 (348.41)                     | 3127.22 (331.47)                   | 3103.69 (336.98)   |
| Height/Length (cm)          |                                      |                                    |                    |
| Mean (SD)                   | 48.67 (1.65)                         | 48.64 (1.66)                       | 48.63 (1.67)       |

**Table S1C: DEMOGRAPHIC CHARACTERISTICS OF STUDY POPULATION (SAFETY POPULATION)**

|                             | Neonatal Vaccine Schedule<br>(N=545) | Infant Vaccine Schedule<br>(N=546) | Placebo<br>(N=549) |
|-----------------------------|--------------------------------------|------------------------------------|--------------------|
| Age at randomization (days) |                                      |                                    |                    |
| Mean (SD)                   | 3.4 (1.3)                            | 3.5 (1.3)                          | 3.5 (1.3)          |
| Sex                         |                                      |                                    |                    |
| Male                        | 296 (54.3%)                          | 285 (52.2%)                        | 278 (50.6%)        |
| Ethnicity                   |                                      |                                    |                    |
| Javanese                    | 544 (99.8%)                          | 544 (99.6%)                        | 547 (99.6%)        |
| Sundanese                   | 0 (0.0%)                             | 0 (0.0%)                           | 1 (0.2%)           |
| Chinese                     | 0 (0.0%)                             | 1 (0.2%)                           | 0 (0.0%)           |
| Malaya                      | 0 (0.0%)                             | 0 (0.0%)                           | 0 (0.0%)           |
| Other                       | 1 (0.2%)                             | 1 (0.2%)                           | 1 (0.2%)           |
| Gestational Age (weeks)     |                                      |                                    |                    |
| Mean (SD)                   | 39.54 (1.11)                         | 39.51 (1.10)                       | 39.51 (1.12)       |
| Birth Weight (g)            |                                      |                                    |                    |
| Mean (SD)                   | 3115.36 (345.65)                     | 3129.21 (330.71)                   | 3102.97 (336.86)   |
| Height/Length (cm)          |                                      |                                    |                    |
| Mean (SD)                   | 48.66 (1.64)                         | 48.63 (1.66)                       | 48.63 (1.68)       |

**TABLE S2: Additional secondary analyses of RV3-BB Vaccine Efficacy**

| <b>EFFICACY OF RV3-BB VACCINE AGAINST SEVERE ROTAVIRUS GASTROENTERITIS TO 12 MONTHS OF AGE<br/>(PER PROTOCOL ANALYSIS)</b> |          |                                             |                  |               |                |
|----------------------------------------------------------------------------------------------------------------------------|----------|---------------------------------------------|------------------|---------------|----------------|
|                                                                                                                            | <b>N</b> | <b>No. participants with an episode (%)</b> | <b>Efficacy*</b> | <b>95% CI</b> | <b>p value</b> |
| <b>Placebo</b>                                                                                                             | 504      | 17 (3.4%)                                   |                  |               |                |
| <b>Combined Vaccine Group</b>                                                                                              | 1009     | 5 (0.5%)                                    | 85%              | 60, 95        | <0.001         |
| <b>Neonatal Vaccine Group</b>                                                                                              | 498      | 1 (0.2%)                                    | 94%              | 55, 99        | 0.006          |
| <b>Infant Vaccine Group</b>                                                                                                | 511      | 4 (0.8%)                                    | 77%              | 32, 92        | 0.008          |
| <b>EFFICACY OF RV3-BB VACCINE AGAINST ROTAVIRUS GASTROENTERITIS TO 18 MONTHS OF AGE<br/>(PER PROTOCOL ANALYSIS)</b>        |          |                                             |                  |               |                |
|                                                                                                                            | <b>N</b> | <b>No. participants with an episode (%)</b> | <b>Efficacy*</b> | <b>95% CI</b> | <b>p value</b> |
| <b>Placebo</b>                                                                                                             | 504      | 47 (9.3%)                                   |                  |               |                |
| <b>Combined Vaccine Group</b>                                                                                              | 1009     | 43 (4.3%)                                   | 54%              | 31,70         | <0.001         |
| <b>Neonatal Vaccine Group</b>                                                                                              | 498      | 17 (3.4%)                                   | 63%              | 37,81         | <0.001         |
| <b>Infant Vaccine Group</b>                                                                                                | 511      | 26 (5.1%)                                   | 45%              | 12,69         | 0.01           |

| <b>EFFICACY OF RV3-BB VACCINE AGAINST ALL-CAUSE SEVERE GASTROENTERITIS TO 18 MONTHS OF AGE<br/>(PER PROTOCOL ANALYSIS)</b> |          |                                             |                  |               |                |
|----------------------------------------------------------------------------------------------------------------------------|----------|---------------------------------------------|------------------|---------------|----------------|
|                                                                                                                            | <b>N</b> | <b>No. participants with an episode (%)</b> | <b>Efficacy*</b> | <b>95% CI</b> | <b>p value</b> |
| <b>Placebo</b>                                                                                                             | 504      | 55 (10.9%)                                  |                  |               |                |
| <b>Combined Vaccine Group</b>                                                                                              | 1009     | 82 (8.1%)                                   | 26%              | -5,46         | 0.09           |
| <b>Neonatal Vaccine Group</b>                                                                                              | 498      | 42 (8.4%)                                   | 27%              | -7,52         | 0.11           |
| <b>Infant Vaccine Group</b>                                                                                                | 511      | 40 (7.8%)                                   | 28%              | -6,53         | 0.11           |

\* when compared to respective placebo participants



**Table S3: Cumulative vaccine take in Immunogenicity subset (per-protocol population)**

**A) Neonatal vaccine schedule comparison**

|                                           | Neonatal Vaccine Group | Neonatal Placebo Group | Difference in proportions (95% CI) | p value |
|-------------------------------------------|------------------------|------------------------|------------------------------------|---------|
| <b>Dose 1: 0-5 days of age IP dose</b>    |                        |                        |                                    |         |
| Serum Response                            | 17/82 (21%)            | 14/77 (18%)            |                                    |         |
| Serum IgA                                 | 17/82 (21%)            | 14/77 (18%)            |                                    |         |
| SNA                                       | 0/82 (0%)              | 0/77(0%)               |                                    |         |
| Stool excretion                           | 3/82 (4%)              | 2/78 (3%)              |                                    |         |
| Vaccine Take                              | 19/83 (23%)            | 15/79 (19%)            |                                    | >0.01   |
| <b>Dose 2: 8-10 weeks of age IP dose^</b> |                        |                        |                                    |         |
| Cumulative Stool excretion                | 35/83 (42%)            | 3/79 (4%)              |                                    |         |
| Cumulative Vaccine Take                   | 44/83 (53%)*           | 16/79 (20%)*           |                                    | <0.001  |
| <b>Dose 3: 14-16 weeks of age IP dose</b> |                        |                        |                                    |         |
| Cumulative Serum Response                 | 63/83 (76%)            | 32/78 (41%)            | 0.35 (0.18, 0.49)                  | <0.001  |
| Cumulative Serum IgA                      | 55/83 (66%)            | 31/78 (40%)            | 0.27 (0.10, 0.41)                  | <0.001  |
| Cumulative SNA                            | 20/83 (24%)            | 4/78 (5%)              | 0.19 (0.07,0.30)                   | <0.001  |
| Cumulative Stool excretion                | 57/83 (69%)            | 4/79 (5%)              | 0.64 (0.51, 0.74)                  | <0.001  |
| Cumulative Vaccine Take                   | 78/83 (94%)            | 33/79 (42%)            | 0.52 (0.39, 0.64)                  | <0.001  |

\*No assessment of serum immune response conducted at this time-point

### B) Infant vaccine schedule comparison

|                                              | Infant Vaccine Schedule | Infant Placebo Group | Difference in proportions (95% CI) | p value |
|----------------------------------------------|-------------------------|----------------------|------------------------------------|---------|
| <b>Dose 1: 8-10 weeks of age<sup>^</sup></b> |                         |                      |                                    |         |
| Stool excretion                              | 33/78 (42%)             | 1/77 (1%)            |                                    |         |
| Vaccine Take                                 | 33/78 (42%)*            | 1/77 (1%)*           |                                    | <0.001  |
| <b>Dose 2: 14-16 weeks of age</b>            |                         |                      |                                    |         |
| Serum Response                               | 55/84 (66%)             | 22/78 (28%)          |                                    |         |
| Serum IgA                                    | 52/84 (62%)             | 19/78 (24%)          |                                    |         |
| SNA                                          | 11/84 (13%)             | 4/77 (5%)            |                                    |         |
| Cumulative stool excretion                   | 52/84 (62%)             | 2/78 (3%)            |                                    |         |
| Cumulative Vaccine Take                      | 73/84 (87%)             | 22/79 (28%)          | 0.59 (0.45, 0.71)                  | <0.001  |
| <b>Dose 3: 20-24 weeks of age</b>            |                         |                      |                                    |         |
| Cumulative Serum Response                    | 73/84 (87%)             | 37/78 (47%)          | 0.39 (0.24, 0.53)                  | <0.001  |
| Cumulative Serum IgA                         | 68/84 (81%)             | 33/78 (42%)          | 0.39 (0.23, 0.52)                  | <0.001  |
| Cumulative SNA                               | 32/84 (38%)             | 6/78 (8%)            | 0.30 (0.17, 0.43)                  | <0.001  |
| Cumulative stool excretion                   | 63/84 (75%)             | 2/78 (3%)            | 0.72 (0.61, 0.82)                  | <0.001  |
| Cumulative Vaccine Take                      | 83/84 (99%)             | 37/79 (47%)          | 0.52 (0.40, 0.63)                  | <0.001  |

\*No assessment of serum immune response conducted at this time-point

**Table S4: Adverse Events reported in Safety Population**

| <b>Safety population</b>                                                                                             | <b>Neonatal Vaccine schedule (IP dose 1-3) N=545</b> | <b>Neonatal Placebo schedule (IP dose 1-3) N=549</b> | <b>Infant Vaccine Schedule (IP dose 2-4) N=538</b> | <b>Infant Placebo Schedule (IP dose 2-4) N=537</b> |
|----------------------------------------------------------------------------------------------------------------------|------------------------------------------------------|------------------------------------------------------|----------------------------------------------------|----------------------------------------------------|
| <b>Unsolicited Adverse Events (0 to 28 days post dose)</b>                                                           |                                                      |                                                      |                                                    |                                                    |
| Subjects with at least one unsolicited AE                                                                            | 311                                                  | 330                                                  | 323                                                | 329                                                |
| Subjects with at least one ≥Grade 3/severe unsolicited AE assessed as possibly, probably or definitely related to IP | 2                                                    | 1                                                    | 0                                                  | 0                                                  |
| Subjects with at least one unsolicited AE assessed as possibly, probably or definitely related to IP                 | 107                                                  | 109                                                  | 98                                                 | 111                                                |
| Total number of unsolicited AEs                                                                                      | 618                                                  | 615                                                  | 640                                                | 648                                                |
| Total number of ≥Grade 3/severe unsolicited AEs assessed as possibly, probably or definitely related to IP           | 4                                                    | 1                                                    | 0                                                  | 0                                                  |
| Total number of unsolicited AEs assessed as possibly, probably or definitely related to IP                           | 183                                                  | 182                                                  | 169                                                | 187                                                |
| <b>Solicited Adverse Events (0-7 days post dose)</b>                                                                 |                                                      |                                                      |                                                    |                                                    |
| Subjects with at least one solicited AE                                                                              | 400                                                  | 388                                                  | 395                                                | 387                                                |

|                                                                                                                          |      |      |      |      |
|--------------------------------------------------------------------------------------------------------------------------|------|------|------|------|
| Subjects with at least one $\geq$ Grade 3/severe solicited AE assessed as possibly, probably or definitely related to IP | 1    | 0    | 0    | 0    |
| Subjects with at least one solicited AE assessed as possibly, probably or definitely related to IP                       | 272  | 280  | 285  | 282  |
| Total number of solicited AEs                                                                                            | 1262 | 1239 | 1475 | 1470 |
| Total number of $\geq$ Grade 3/severe solicited AEs assessed as possibly, probably or definitely related to IP           | 3    | 0    | 0    | 0    |
| Total number of solicited AEs assessed as possibly, probably or definitely related to IP                                 | 816  | 829  | 983  | 1010 |

**Table S5: Fatal Events**

| <b>Fatal Serious Adverse Events<br/>(Preferred term)</b> | <b>Neonatal Schedule</b> | <b>Infant Schedule</b> | <b>Placebo</b> |
|----------------------------------------------------------|--------------------------|------------------------|----------------|
| <b>&lt;28 days post any IP dose</b>                      |                          |                        |                |
| Persistent fetal circulation                             | 0                        | 0                      | 1              |
| Volvulus                                                 | 0                        | 0                      | 1              |
| Encephalitis                                             | 1                        | 0                      | 0              |
| Neonatal aspiration                                      | 0                        | 0                      | 1              |
| <b>&gt;28 days post IP dose</b>                          |                          |                        |                |
| Ventricular Septal Defect                                | 1                        | 0                      | 0              |
| Septic shock                                             | 2                        | 0                      | 1              |
| Brain mass                                               | 1                        | 0                      | 0              |
| Fallot's Tetralogy                                       | 0                        | 0                      | 1              |
| Dengue fever                                             | 0                        | 0                      | 1              |
| <b>Total</b>                                             | <b>5</b>                 | <b>0</b>               | <b>6</b>       |
